# Supplementary material
Source: publisher site journal article supplement (http://www.kjim.org/upload/media/kjim-2020-551-suppl2.pdf)
Supplement: Supplementary file 1 [file kjim-2020-551-suppl2.pdf]

**Supplementary Table 2. Operational definition of cardiovascular diseases**

| ICD-10-CM code and definition | Diagnostic definition                                                                                                                                                                                                                          | Condition<br>(hospitalization, outpatient<br>clinic condition) |
|-------------------------------|------------------------------------------------------------------------------------------------------------------------------------------------------------------------------------------------------------------------------------------------|----------------------------------------------------------------|
| Hypertension                  | I10–I13, I15; and minimum 1 prescription of anti-hypertensive drug (thiazide, loop diuretics, aldosterone antagonist, alpha-/beta-blocker, calcium-channel blocker, angiotensin-converting enzyme inhibitor, angiotensin II receptor blocker). | Admission $\geq$ 1 or outpatient department $\geq$ 2           |
| Diabetes mellitus             | E11–E14; (KCD) and minimum 1 prescription of anti-diabetic drugs (sulfonylureas, metformin, meglitinides, thiazolidinediones, dipeptidyl peptidase-4 inhibitors, $\alpha$ -glucosidase inhibitors and insulin).                                | Admission $\geq$ 1 or outpatient department $\geq$ 2           |
| Dyslipidemia                  | E78; and minimum 1 prescription of lipid lowering agent                                                                                                                                                                                        | Admission or outpatient department $\geq$ 1                    |
| Atrial fibrillation           | I480 (I48.4)–484 (I48.4), I489 (I48.9)                                                                                                                                                                                                         | Admission or outpatient department $\geq$ 1                    |
| Heart failure                 | I50                                                                                                                                                                                                                                            | Admission or outpatient department $\geq$ 1                    |
| Myocardial infarction         | I21, I22                                                                                                                                                                                                                                       | Admission or outpatient department $\geq$ 1                    |
| COPD                          | J41–44                                                                                                                                                                                                                                         | Admission or outpatient department $\geq$ 1                    |
| ESRD                          | N18; N19; Z49; Z905 (Z90.5); Z94; Z992 (Z99.2)                                                                                                                                                                                                 | Admission or outpatient department $\geq$ 1                    |
| Pulmonary embolism            | I26                                                                                                                                                                                                                                            | Admission $\geq$ 1                                             |
| Deep vein thrombosis          | I802 (I80.2)                                                                                                                                                                                                                                   | Admission $\geq$ 1                                             |
| Ischemic stroke               | I63, I64                                                                                                                                                                                                                                       | Admission $\geq$ 1                                             |
| Intracranial hemorrhage       | I60–62                                                                                                                                                                                                                                         | Admission $\geq$ 1                                             |
| Peripheral artery disease     | I70, I73                                                                                                                                                                                                                                       | Admission or outpatient department $\geq$ 2                    |

ICD-10-CM, International Classification of Diseases, Tenth Revision, Clinical Modification; KCD, Korean standard, classification of diseases; COPD, chronic obstructive pulmonary disorder; ESRD, end stage renal disease.
